# Supplementary material
Source: PubMed Central journal article supplement (PMC7197019)
Supplement: pnas.1919658117.sapp.pdf [file pnas.1919658117.sapp.pdf]

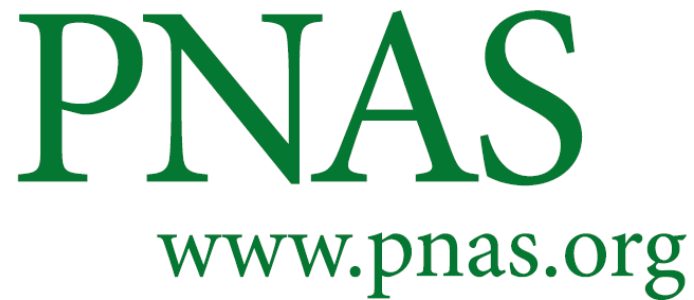

Supplementary Information for

**Cytokinesis and postabscission midbody remnants are regulated during  
mammalian brain development**

Katrina C. McNeely<sup>1,2</sup>, and Noelle D. Dwyer<sup>1\*</sup>

<sup>1</sup>Department of Cell Biology and <sup>2</sup>Neuroscience Graduate Program, University of Virginia School of Medicine, Charlottesville, VA 22908, USA \*Correspondence: [ndwyer@virginia.edu](mailto:ndwyer@virginia.edu)

**This PDF file includes:**

Figures S1

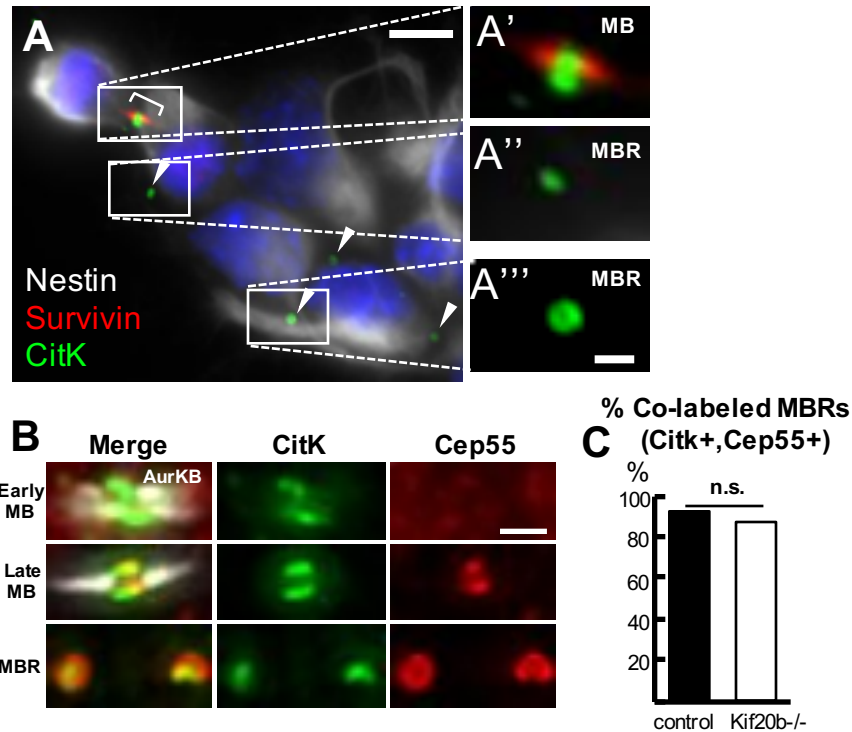

**Supplemental Figure 1: NSC midbody remnants (MBRs) retain central bulge (marked by CitK or Cep55), but not midbody flanks (marked by Survivin or AurKB).**

(A) Preabscission midbodies (bracket, MB) can be distinguished from postabscission midbody remnants (arrowheads, MBRs) on NSCs. Dissociated E12.5 NSCs are identified by endogenous staining for Nestin. In preabscission midbodies, Citron kinase (CitK) appears as a ring within the central bulge (A'), while Survivin labels surrounding midbody flanks in a daughter pair still connected by a pre-abscission midbody (A'). CitK is also retained in postabscission MBRs (A'', A''')(1, 2)).

(B) Images of dissociated E11.5 NSCs immunostained for endogenous CitK, Cep55, and AurKB show their distinct localizations at different midbody maturation stages. AurKB localizes to the flanks of early and late midbodies, but is mostly absent in postabscission MBRs. CitK localizes as a ring in the central bulge of early and late midbodies as well as MBRs. Cep55 is absent in early midbodies, but accumulates in a ring at the midbody central bulge, but only at late stages, and remains in MBRs (3-5).

(C) MBRs of NSCs can be detected with either CitK or Cep55 immunostaining, as the vast majority of MBRs are labeled strongly by both markers.

Scalebars: 5  $\mu\text{m}$  in A; 1  $\mu\text{m}$  in A', A''', and B.

n= 61 control MBR (1 brain), 49 *Kif20b*<sup>-/-</sup> MBR (1 brain) For C: n.s, not significant (Fisher's exact test).

## References

1. Ettinger AW, *et al.* (2011) Proliferating versus differentiating stem and cancer cells exhibit distinct midbody-release behaviour. *Nat Commun* 2:503.
2. Gruneberg U, *et al.* (2006) KIF14 and citron kinase act together to promote efficient cytokinesis. *The Journal of cell biology* 172(3):363-372.
3. Kuo TC, *et al.* (2011) Midbody accumulation through evasion of autophagy contributes to cellular reprogramming and tumorigenicity. *Nat Cell Biol* 13(10):1214-1223.
4. Crowell EF, Gaffuri AL, Gayraud-Morel B, Tajbakhsh S, & Echard A (2014) Engulfment of the midbody remnant after cytokinesis in mammalian cells. *J Cell Sci* 127(Pt 17):3840-3851.
5. Bastos RN & Barr FA (2010) Plk1 negatively regulates Cep55 recruitment to the midbody to ensure orderly abscission. *The Journal of cell biology* 191(4):751-760.
